# Supplementary material for: Analytical Quality by Design (AQbD) Approach to the Development of Analytical Procedures for Medicinal Plants
Source: MDPI journal article supplement (doi:10.3390/plants11212960), 2022-11-02
Supplement: s1 [file plants-1968789 supplemently.pdf › plants-1968789 supplemently.pdf]

**Table S1.** Applications of AQbD to the development of analytical procedures for plant sources, published from 2016 to 2021.

| Medicinal plant                                    | ATP 1;<br>APIs                                                                                                                                                                                                                                                                                  | ATP 2;<br>Technique | ATP 3;<br>Method<br>requirements | Risk assessment                                           | CAPAs                                                                | Potential APPs                                                                                                                        | CAPPs                                                                   | DoE<br>Screening | Optimization | MODR                    | Ref. |
|----------------------------------------------------|-------------------------------------------------------------------------------------------------------------------------------------------------------------------------------------------------------------------------------------------------------------------------------------------------|---------------------|----------------------------------|-----------------------------------------------------------|----------------------------------------------------------------------|---------------------------------------------------------------------------------------------------------------------------------------|-------------------------------------------------------------------------|------------------|--------------|-------------------------|------|
| <i>Ginkgo biloba</i>                               | Terpene trilactones (ginkgolide A, B, and C, bilobalide)                                                                                                                                                                                                                                        | HPLC-ESI-MS         | Quantification                   | Ishikawa diagram                                          | ion peak area                                                        | solvent flow rate;<br>formic acid conc.;<br>column temp.;<br>gas flow rate;<br>gas temp.;<br>nebulizer pressure;<br>capillary voltage | solvent flow rate;<br>formic acid conc.;<br>gas flow rate;<br>gas temp. | PBD              | BBD          | Monte-Carlo probability | [41] |
| <i>Plumbago</i> species                            | Napthoquinone (plumbagin)                                                                                                                                                                                                                                                                       | HPLC-PDA            | Quantification                   | Ishikawa diagram (CMPs);<br>Risk estimation matrix (CMAs) | retention time;<br>peak area;<br>symmetry;<br>theoretical plates     | N/A                                                                                                                                   | plumbagin conc.;<br>flow rate;<br>solvent ratio                         | N/A              | BBD          | Desirability function   | [37] |
| <i>Daphne genkwa</i>                               | Flavonoids (apigenin-5- <i>O</i> -glucoside, apigenin-7- <i>O</i> -glucoside, yuanhuanin, apigenin-7- <i>O</i> -glucuronide, genkwanin-5- <i>O</i> -primeveroside, genkwanin-5- <i>O</i> -glucoside, genkwanin-4'- <i>O</i> -rutinoside, tiliroside, apigenin, 3'-hydroxy-genkwanin, genkwanin) | UHPLC-PDA           | Separation;<br>Quantification    | Ishikawa diagram;<br>FMEA                                 | (screening)<br>countable peak number;<br>(optimization)<br>sum of Rs | injection volume;<br>column temp.;<br>gradient slope (run time);<br>flow rate                                                         | column temp.;<br>gradient slope (run time)                              | FFD              | CCD          | N/A                     | [34] |
| <i>Curcuma longa</i>                               | Curcuminoids (curcumin, demethoxy-curcumin, bisdemethoxy-curcumin)                                                                                                                                                                                                                              | HPLC-UV             | Quantification                   | N/A                                                       | symmetry;<br>peak width                                              | N/A                                                                                                                                   | orthophosphoric acid conc.;<br>solvent ratio                            | N/A              | FFD          | Overlay plot            | [40] |
| <i>Paeonia lactiflora</i><br><i>Angelica gigas</i> | Monoterpenoid (paeoniflorin)<br>Courmarin (decursin)                                                                                                                                                                                                                                            | HPLC-PDA            | Quantification                   | Risk estimation matrix                                    | critical Rs;<br>symmetry                                             | N/A                                                                                                                                   | column temp.;<br>gradient elution                                       | N/A              | CCD          | Overlay plot            | [36] |
| <i>Cannabis</i> species                            | Cannabinoids (cannabidiol, $\Delta^9$ -tetrahydro-                                                                                                                                                                                                                                              | UHPSFC-UV           | Separation;<br>Quantification    | Ishikawa diagram                                          | critical Rs                                                          | N/A                                                                                                                                   | column temp.;<br>column batch;<br>formic acid conc.;                    | N/A              | FFD          | N/A                     | [43] |

| Medicinal plant                     | ATP 1;<br>APIs                                                                                                                                                                                                                                                                                                                                                 | ATP 2;<br>Technique | ATP 3;<br>Method<br>requirements | Risk assessment           | CAPAs                                                 | Potential APPs                                                                       | CAPPs                                        | DoE<br>Screening                  | Optimization       | MODR                                                                    | Ref. |
|-------------------------------------|----------------------------------------------------------------------------------------------------------------------------------------------------------------------------------------------------------------------------------------------------------------------------------------------------------------------------------------------------------------|---------------------|----------------------------------|---------------------------|-------------------------------------------------------|--------------------------------------------------------------------------------------|----------------------------------------------|-----------------------------------|--------------------|-------------------------------------------------------------------------|------|
|                                     | cannabinol,<br>$\Delta^9$ -tetrahydro-<br>cannabinolic acid<br>A,<br>cannabidiolic acid,<br>cannabinol,<br>cannabigerol,<br>cannabigerolic<br>acid,<br>$\Delta^8$ -tetrahydro-<br>cannabinol,<br>cannabichromene)                                                                                                                                              |                     |                                  |                           |                                                       |                                                                                      | starting gradient                            |                                   |                    |                                                                         |      |
| Sugarcane Honey                     | Sugars<br>(D-glucose,<br>D-fructose,<br>sucrose,<br>D-xylose,<br>D-mannose,<br>L-rhamnose)                                                                                                                                                                                                                                                                     | HPLC-RI             | Separation;<br>Quantification    | Ishikawa diagram          | total peak area;<br>critical Rs;<br>symmetry;<br>RSD  | type of solvent;<br>acetone conc.;<br>flow rate;<br>column temp.                     | acetone conc.;<br>flow rate;<br>column temp. | N/A                               | FFD                | PRA;<br>RSM;<br>Monte-Carlo<br>probability;<br>Desirability<br>function | [44] |
| <i>Cannabis</i> -<br>olive oil      | Cannabinoids<br>(cannabidiol,<br>$\Delta^9$ -tetrahydro-<br>cannabinol)                                                                                                                                                                                                                                                                                        | HPLC-UV             | Selective<br>determination       | Ishikawa diagram          | analysis time;<br>critical Rs                         | N/A                                                                                  | column temp.;<br>pH;<br>flow rate            | N/A                               | Doehlert<br>design | Bayesian<br>probability                                                 | [74] |
| <i>Glycyrrhiza</i><br><i>glabra</i> | Flavonoids<br>(glucoliquiritin,<br>schaftoside,<br>isoliquiritin<br>apioside,<br>liquiritin apioside,<br>liquiritin,<br>neolicucuroside,<br>isoliquiritin,<br>licorice glycoside<br>A,<br>liquiritigenin,<br>Triterpenoids<br>(licorice saponin<br>A <sub>3</sub> ,<br>22-acetoxy-<br>glycyrrhizin,<br>licorice saponin G <sub>2</sub> ,<br>glycyrrhizin acid) | UHPLC-PDA           | Chromatographic<br>fingerprint   | Ishikawa diagram;<br>FMEA | critical Rs;<br>total peak number;<br>capacity factor | gradient elution;<br>flow rate;<br>column temp.;<br>wavelength;<br>formic acid conc. | gradient elution                             | PBD                               | CCD                | Monte-Carlo<br>probability                                              | [35] |
| <i>Diospyros kaki</i>               | Polyphenols                                                                                                                                                                                                                                                                                                                                                    | UPLC-MS/MS          | Selective<br>determination       | Ishikawa diagram          | analysis time;<br>critical Rs                         | flow rate;<br>column temp.;<br>starting organic phase<br>conc.;                      | column temp.;<br>starting organic phase      | Asymmetric<br>screening<br>matrix | Doehlert<br>design | Monte-Carlo<br>probability                                              | [42] |

| Medicinal plant                                                | ATP 1;<br>APIs                                                                                                                                                                                                                                                    | ATP 2;<br>Technique  | ATP 3;<br>Method<br>requirements      | Risk assessment            | CAPAs                                                                                                          | Potential APPs                                                                                                                                                                                                             | CAPPs                                                                                                                                                                       | DoE<br>Screening | Optimization                            | MODR                                                  | Ref. |
|----------------------------------------------------------------|-------------------------------------------------------------------------------------------------------------------------------------------------------------------------------------------------------------------------------------------------------------------|----------------------|---------------------------------------|----------------------------|----------------------------------------------------------------------------------------------------------------|----------------------------------------------------------------------------------------------------------------------------------------------------------------------------------------------------------------------------|-----------------------------------------------------------------------------------------------------------------------------------------------------------------------------|------------------|-----------------------------------------|-------------------------------------------------------|------|
|                                                                |                                                                                                                                                                                                                                                                   |                      |                                       |                            |                                                                                                                | conc.;<br>formic acid conc.;<br>type of organic<br>solvent;<br>gradient elution                                                                                                                                            | formic acid conc.;<br>gradient elution                                                                                                                                      |                  |                                         |                                                       |      |
| <i>Codonopsis pilosula</i> ,<br><i>Astragalus membranaceus</i> | Sugars<br>(D-glucose,<br>D-fructose,<br>sucrose)                                                                                                                                                                                                                  | HPLC-ELSD            | Quantification                        | N/A                        | critical Rt;<br>S/N ratio                                                                                      | gradient elution;<br>flow rate;<br>column temp.;<br>gradient run time;<br>triethylamine conc.;<br>ELSD drift tube<br>temp.;<br>gas flow rate                                                                               | gradient elution;<br>flow rate;<br>column temp.                                                                                                                             | fFD              | BBD                                     | Monte-Carlo<br>probability                            | [45] |
| Sugarcane honey<br>( <i>Saccharum officinarum</i> L.)          | Sugars<br>(5-hydroxymethyl-<br>2-furaldehyde,<br>2-furaldehyde,<br>2-furylmethanol,<br>2-furyl methyl<br>ketone,<br>5-methyl-2-<br>furaldehyde)                                                                                                                   | MEPS-UHPLC-<br>PDA   | Separation;<br>Quantification         | Ishikawa diagram           | (MEPS)<br>total peak area;<br>RSD<br>(UHPLC-PDA)<br>total peak area;<br>critical Rs                            | N/A                                                                                                                                                                                                                        | (MEPS)<br>elution solvent;<br>loading cycles;<br>sample loading<br>volume;<br>sorbent type<br>(UHPLC-PDA)<br>organic solvent;<br>flow rate;<br>column temp.;<br>column type | N/A              | (MEPS)<br>FFD<br>(UHPLC-<br>PDA)<br>FFD | Monte-Carlo<br>probability;<br>Capability<br>analysis | [46] |
| <i>Coptis chinensis</i>                                        | Alkaloids<br>(jateorrhizine,<br>columbamine,<br>epiberberine,<br>coptisine,<br>palmatine,<br>berberine)                                                                                                                                                           | HPLC-PDA             | Separation;<br>Short analysis<br>time | N/A                        | (screening)<br>critical Rs;<br>analysis time;<br>peak width<br>(optimization)<br>critical Rs;<br>analysis time | gradient elution;<br>pH;<br>column temp.;<br>sodium dodecyl<br>sulfate conc.;<br>potassium phosphate<br>monobasic conc.                                                                                                    | gradient elution;<br>sodium dodecyl<br>sulfate conc.;<br>potassium phosphate<br>monobasic conc.                                                                             | PBD              | BBD                                     | Bayesian<br>probability                               | [69] |
| <i>Codonopsis pilosula</i><br><i>Astragalus membranaceus</i>   | Monosaccharide<br>derivative<br>(syringin,<br>9,10-dimethoxy-<br>ptercarpan-3- <i>O</i> -<br>glucoside)<br>Flavonoids<br>(calycosin-7- <i>O</i> -<br>glucoside,<br>ononin,<br>2'-hydroxy-3'4'-<br>dimethoxyisoflavan-<br>7- <i>O</i> -glucoside)<br>Polyacetylene | SPE-HPLC-<br>UV/ELSD | Separation;<br>Quantification         | preliminary<br>experiments | critical Rs;<br>S/N                                                                                            | (SPE)<br>sorbent mass;<br>sample volume;<br>elution volume;<br>elution speed<br>(HPLC-UV/ELSD)<br>formic acid conc.;<br>flow rate;<br>column temp.;<br>evaporator temp.;<br>nebulizer temp.;<br>gas flow rate;<br>PMT gain | (SPE)<br>sorbent mass;<br>sample volume;<br>(HPLC-UV/ELSD)<br>flow rate;<br>column temp.;<br>evaporator temp.;<br>gas flow rate                                             | PBD              | BBD                                     | Monte-Carlo<br>probability                            | [47] |

| Medicinal plant              | ATP 1;<br>APIs                                                                                                    | ATP 2;<br>Technique | ATP 3;<br>Method<br>requirements | Risk assessment | CAPAs                                      | Potential APPs                                  | CAPPs            | DoE<br>Screening    | Optimization | MODR                                                  | Ref. |
|------------------------------|-------------------------------------------------------------------------------------------------------------------|---------------------|----------------------------------|-----------------|--------------------------------------------|-------------------------------------------------|------------------|---------------------|--------------|-------------------------------------------------------|------|
|                              | glycoside<br>(lobetyolin)<br>Triterpenoids<br>(astragaloside IV,<br>astragaloside II,<br>astragaloside I)         |                     |                                  |                 |                                            |                                                 |                  |                     |              |                                                       |      |
| <i>Panax<br/>notoginseng</i> | Saponins<br>(notoginsenoside<br>R1,<br>ginsenoside Rg1,<br>ginsenoside Re,<br>ginsenoside Rb1,<br>ginsenoside Rd) | HPLC-DAD            | Separation;<br>Quantification    | N/A             | analysis time;<br>critical Rs;<br>symmetry | column temp.;<br>flow rate;<br>gradient elution | gradient elution | Screening<br>design | fFD          | Monte-Carlo<br>probability;<br>Capability<br>analysis | [38] |
| <i>Panax<br/>notoginseng</i> | Saponins<br>(notoginsenoside<br>R1,<br>ginsenoside Rg1,<br>ginsenoside Re,<br>ginsenoside Rb1,<br>ginsenoside Rd) | HPLC-UV             | Separation;<br>Quantification    | N/A             | critical Rs                                | N/A                                             | gradient elution | N/A                 | CCD          | Monte-Carlo<br>probability                            | [39] |

Active pharmaceutical ingredient (API); analytical target profile (ATP); Box-Behnken design (BBD); central composite design (CCD); critical analytical procedure attribute (CAPA); analytical procedure parameter (APP); critical analytical procedure parameter (CAPP); concentration (conc.); design of experiment (DoE); evaporative light-scattering detector (ELSD); electrospray ionization (ESI); full factorial design (FFD); fractional factorial design (fFD); failure mode effect analysis (FMEA); high-performance liquid chromatography (HPLC); micro-extraction by packed sorbent (MEPS); method operable design region (MODR); mass spectrometry (MS); not applicable (N/A); Plackett-Burman design (PBD); photodiode array (PDA); pareto ranking analysis (PRA); refractive index (RI); risk priority number (RPN); resolution (Rs); relative standard deviation (RSD); response surface methodologies (RSM); retention time (RT); signal to noise (S/N); solid phase extraction (SPE); temperature (temp.); ultra-high-performance supercritical fluid chromatography (UHPSFC); ultra-high-performance liquid chromatography (UHPLC); ultraviolet (UV).
